# Supplementary material for: Reconstruction and analysis of a large-scale binary Ras-effector signaling network
Source: Cell Commun Signal. 2022 Mar 4;20:24. doi: 10.1186/s12964-022-00823-5 (PMC8896392; doi:10.1186/s12964-022-00823-5)
Supplement: Supplementary file 4 — Additional file 3: Table S2. Hub protein analysis. [file 12964_2022_823_MOESM4_ESM.xlsx]

## Sheet: Sheet1
Table S2. Hub protein analysis. Centrality of the 2290 Ras-downstream proteins.
	out_degree	in_degree	in+out_degree
AAAS	0	1	1
ABI2	0	1	1
ABTB2	0	1	1
ACTG2	0	1	1
ACTL9	0	1	1
ACTR10	0	1	1
ACVR1C	0	1	1
ADAMTSL4	0	1	1
AGBL4	0	1	1
AGO4	0	1	1
AHSG	0	1	1
ALB	0	1	1
ANKS1B	0	1	1
ANXA13	0	1	1
AP1M2	0	1	1
AP3M2	0	1	1
AP4M1	0	1	1
APBA3	0	1	1
APOA1	0	1	1
APOA2	0	1	1
APOA4	0	1	1
ARAP2	1	0	1
ARC	0	1	1
ARHGAP20	1	0	1
ARID1B	0	1	1
ARL4C	0	1	1
ARL4D	0	1	1
ASB16	0	1	1
ASB3	0	1	1
ATE1	0	1	1
AURKB	0	1	1
AURKC	0	1	1
BACE2	0	1	1
BAG6	0	1	1
BBS7	0	1	1
BHLHE41	0	1	1
BIRC8	0	1	1
BMP15	0	1	1
BPIFA1	0	1	1
BPIFB1	0	1	1
C10orf88	0	1	1
C1orf54	0	1	1
C3	0	1	1
C3orf18	0	1	1
C4A	0	1	1
C5AR1	0	1	1
C6orf141	0	1	1
C6orf58	0	1	1
C9orf16	0	1	1
CA6	0	1	1
CABLES2	0	1	1
CAPN2	0	1	1
CAPZA2	0	1	1
CAPZB	0	1	1
CARTPT	0	1	1
CCDC136	0	1	1
CCDC6	0	1	1
CCDC96	0	1	1
CCL25	0	1	1
CCN3	0	1	1
CCNE2	0	1	1
CCNF	0	1	1
CCNG1	0	1	1
CCNI2	0	1	1
CCNL1	0	1	1
CCNO	0	1	1
CCT8L2	0	1	1
CD3D	0	1	1
CDC16	0	1	1
CDC37	0	1	1
CDH5	0	1	1
CDH8	0	1	1
CDK2	0	1	1
CDK3	0	1	1
CDK7	0	1	1
CDK9	0	1	1
CDKL2	0	1	1
CDKN1C	0	1	1
CDRT1	0	1	1
CDS1	0	1	1
CEP72	0	1	1
CEP97	0	1	1
CHRDL1	0	1	1
CIAO2A	0	1	1
CITED1	0	1	1
CLEC16A	0	1	1
CLINT1	0	1	1
CNTD2	0	1	1
CNTF	0	1	1
COMMD5	0	1	1
COPS9	0	1	1
CP	0	1	1
CRLF2	0	1	1
CRYBA4	0	1	1
CRYL1	0	1	1
CSNK1G3	0	1	1
CST4	0	1	1
CXCL16	0	1	1
DCAF7	0	1	1
DCLK3	0	1	1
DDX6	0	1	1
DHDH	0	1	1
DLL3	0	1	1
DMBT1	0	1	1
DNAJC6	0	1	1
DNM3	0	1	1
DPH7	0	1	1
DQX1	0	1	1
DUSP19	0	1	1
DUSP21	0	1	1
EDA	0	1	1
EEF1AKMT2	0	1	1
EFNA3	0	1	1
EFNA4	0	1	1
EFNB3	0	1	1
EHD1	0	1	1
EHD4	0	1	1
EHMT1	0	1	1
EHMT2	0	1	1
EID1	0	1	1
EIF1AD	0	1	1
EIF2B5	0	1	1
EIF5A2	0	1	1
EMB	0	1	1
ERN2	0	1	1
ETS2	0	1	1
EVA1B	0	1	1
EXOC8	0	1	1
EXTL1	0	1	1
FAAP100	0	1	1
FAM124A	0	1	1
FAM131B	0	1	1
FAM136A	0	1	1
FAXC	0	1	1
FBXW9	0	1	1
FGA	0	1	1
FGB	0	1	1
FGF18	0	1	1
FGF6	0	1	1
FGG	0	1	1
FKBP5	0	1	1
FPR2	0	1	1
FTL	0	1	1
FURIN	0	1	1
FZD1	0	1	1
FZD4	0	1	1
GC	0	1	1
GDF11	0	1	1
GKAP1	0	1	1
GNB3	0	1	1
GNPTAB	0	1	1
GOLGA2	0	1	1
GOLPH3	0	1	1
GORASP2	0	1	1
GPBP1L1	0	1	1
GPR156	0	1	1
GRIN3B	0	1	1
GRK1	0	1	1
GRN	0	1	1
GTF3C2	0	1	1
HAX1	0	1	1
HCK	0	1	1
HES6	0	1	1
HIPK4	0	1	1
HNRNPCL2	0	1	1
HOXA1	0	1	1
HP	0	1	1
HPX	0	1	1
HSPA1A	0	1	1
HSPA2	0	1	1
HSPA8	0	1	1
HSPB8	0	1	1
IFNL3	0	1	1
IFT20	0	1	1
IFT43	0	1	1
IGLL5	0	1	1
IL11	0	1	1
IL11RA	0	1	1
IL16	0	1	1
IL21	0	1	1
IL26	0	1	1
IL27	0	1	1
IL36G	0	1	1
IRAK4	0	1	1
ISLR	0	1	1
ITGB1BP2	0	1	1
JCHAIN	0	1	1
KCNE3	0	1	1
KDM1A	0	1	1
KDM3A	0	1	1
KLHL14	0	1	1
KNG1	0	1	1
KYNU	0	1	1
LACRT	0	1	1
LCN1	0	1	1
LCN2	0	1	1
LEP	0	1	1
LGALS3BP	0	1	1
LIG4	0	1	1
LITAF	0	1	1
LRCH1	0	1	1
LRRC36	0	1	1
LTF	0	1	1
LURAP1	0	1	1
LYPD4	0	1	1
LYZ	0	1	1
MAGEA6	0	1	1
MAP7D2	0	1	1
MAPK15	0	1	1
MARCHF1	0	1	1
MASTL	0	1	1
MDK	0	1	1
MEP1B	0	1	1
MPDZ	0	1	1
MRFAP1L1	0	1	1
MRPL42	0	1	1
NAA10	0	1	1
NAA11	0	1	1
NANS	0	1	1
NBPF19	0	1	1
NCAPH2	0	1	1
NEK2	0	1	1
NEUROG3	0	1	1
NFKBIB	0	1	1
NOTCH2NLA	0	1	1
NPR1	0	1	1
NR0B1	0	1	1
NUBP2	0	1	1
OARD1	0	1	1
OASL	0	1	1
OLFM2	0	1	1
ORM1	0	1	1
PARD6B	0	1	1
PBK	0	1	1
PCSK1	0	1	1
PDCD2L	0	1	1
PHKG1	0	1	1
PICALM	0	1	1
PIGR	0	1	1
PILRA	0	1	1
PIM2	0	1	1
PIP	0	1	1
PKP3	0	1	1
PLA2G10	0	1	1
PLA2G12A	0	1	1
PLA2G12B	0	1	1
PLA2G1B	0	1	1
PLA2G2A	0	1	1
PLA2G2C	0	1	1
PLA2G2D	0	1	1
PLA2G2E	0	1	1
PLA2G2F	0	1	1
PLA2G3	0	1	1
PLA2G4A	0	1	1
PLA2G4B	0	1	1
PLA2G4C	0	1	1
PLA2G4D	0	1	1
PLA2G4E	0	1	1
PLA2G4F	0	1	1
PLA2G5	0	1	1
PLA2G6	0	1	1
PLAAT3	0	1	1
PLEKHH1	0	1	1
PLRG1	0	1	1
PM20D2	0	1	1
PMPCB	0	1	1
PNP	0	1	1
POGZ	0	1	1
PPM1B	0	1	1
PPP1R9A	0	1	1
PPP2R2D	0	1	1
PPP3CA	0	1	1
PPP3CB	0	1	1
PPP3R1	0	1	1
PRKACG	0	1	1
PROSER2	0	1	1
PRR4	0	1	1
PSMC3	0	1	1
PTGES3	0	1	1
QPRT	0	1	1
RAB5A	0	1	1
RAB5B	0	1	1
RADX	0	1	1
RAPGEF4	1	0	1
RARRES1	0	1	1
RBBP5	0	1	1
RBBP7	0	1	1
RBM33	0	1	1
RBM47	0	1	1
RCVRN	0	1	1
RIN3	1	0	1
RIPK3	0	1	1
RNASEL	0	1	1
S100A2	0	1	1
S100Z	0	1	1
SBK2	0	1	1
SBK3	0	1	1
SCGB1D1	0	1	1
SCGB2A1	0	1	1
SCYL1	0	1	1
SDF4	0	1	1
SEC13	0	1	1
SEC23A	0	1	1
SENP3	0	1	1
SERPINA1	0	1	1
SERPINA3	0	1	1
SERPINB2	0	1	1
SF3B3	0	1	1
SLC25A41	0	1	1
SLK	0	1	1
SMUG1	0	1	1
SNAP29	0	1	1
SNAPC4	0	1	1
SNX17	0	1	1
SOWAHB	0	1	1
SPANXN4	0	1	1
SPARC	0	1	1
SRPK3	0	1	1
STAMBPL1	0	1	1
TACR3	0	1	1
TAFA3	0	1	1
TANC2	0	1	1
TARS3	0	1	1
TBL3	0	1	1
TCF20	0	1	1
TENT5D	0	1	1
TF	0	1	1
TFPT	0	1	1
TGM1	0	1	1
THBS3	0	1	1
TLX3	0	1	1
TMOD4	0	1	1
TNFRSF10D	0	1	1
TPBG	0	1	1
TPP1	0	1	1
TRIM52	0	1	1
TSSK6	0	1	1
TTR	0	1	1
TTYH1	0	1	1
TUBB	0	1	1
TUBB6	0	1	1
TXLNA	0	1	1
UBE2J1	0	1	1
UBE2L6	0	1	1
UBE2M	0	1	1
UBQLN1	0	1	1
UBQLN2	0	1	1
UFSP1	0	1	1
UQCRC1	0	1	1
UTP4	0	1	1
VAPB	0	1	1
VPS26B	0	1	1
VSIG4	0	1	1
WDR18	0	1	1
WDR24	0	1	1
WDR3	0	1	1
WDR5B	0	1	1
WDR6	0	1	1
WDR81	0	1	1
WDR87	0	1	1
WDR91	0	1	1
WEE2	0	1	1
WIZ	0	1	1
WNK4	0	1	1
WNT16	0	1	1
WNT8A	0	1	1
WRAP53	0	1	1
ZCCHC10	0	1	1
ZCCHC9	0	1	1
ZG16B	0	1	1
ZNF410	0	1	1
ZNF512B	0	1	1
ZNF639	0	1	1
ZRANB1	0	1	1
ABCC8	0	2	2
ABHD16B	0	2	2
ACKR3	0	2	2
ACTC1	0	2	2
ACTG1	0	2	2
ACTL7A	0	2	2
ACTR1A	0	2	2
ACTR3B	0	2	2
ACTR8	0	2	2
ACTRT2	0	2	2
ACTRT3	0	2	2
ADAMTSL1	0	2	2
ADGRG6	0	2	2
AMH	0	2	2
ANAPC10	0	2	2
ANGPTL1	0	2	2
AP2A1	0	2	2
APBB3	0	2	2
APH1A	0	2	2
APLP2	0	2	2
ARHGAP9	0	2	2
ARHGEF15	0	2	2
ARMC1	0	2	2
ARMC7	0	2	2
ATXN2L	0	2	2
BAG2	0	2	2
BAMBI	0	2	2
BCL10	0	2	2
BIRC7	0	2	2
BUB1B	0	2	2
BUB3	0	2	2
CAMK1	0	2	2
CAMKK1	0	2	2
CAMKV	0	2	2
CCDC22	0	2	2
CCN5	0	2	2
CCNB2	0	2	2
CCNB3	0	2	2
CCND2	0	2	2
CCNH	0	2	2
CCNI	0	2	2
CCNJ	0	2	2
CCNL2	0	2	2
CCNQ	0	2	2
CCNT2	0	2	2
CDC20B	0	2	2
CDC34	0	2	2
CDC42EP1	0	2	2
CDC6	0	2	2
CDK11A	0	2	2
CDK20	0	2	2
CDKL4	0	2	2
CDO1	0	2	2
CENPH	0	2	2
CIAO1	0	2	2
CIC	0	2	2
CLK3	0	2	2
CLU	0	2	2
CNTD1	0	2	2
CORO6	0	2	2
CRLF1	0	2	2
CSNK1G2	0	2	2
CTSA	0	2	2
CYSRT1	0	2	2
DACT2	0	2	2
DAPP1	0	2	2
DBH	0	2	2
DBN1	0	2	2
DCAF13	0	2	2
DCAF4L1	0	2	2
DCTN2	0	2	2
DDB2	0	2	2
DDX41	0	2	2
DLL4	0	2	2
DMWD	0	2	2
DUSP2	0	2	2
DYRK1B	0	2	2
DYRK2	0	2	2
DYRK3	0	2	2
EED	0	2	2
EEF1AKMT3	0	2	2
EFS	0	2	2
EGR3	0	2	2
EIF2AK1	0	2	2
EMILIN1	0	2	2
EML3	0	2	2
FADS6	0	2	2
FAM193B	0	2	2
FAM222B	0	2	2
FBXW10	0	2	2
FBXW5	0	2	2
FES	0	2	2
FGF17	0	2	2
FGF3	0	2	2
FHL3	0	2	2
FMN2	0	2	2
FOXA2	0	2	2
FOXC2	0	2	2
FOXF1	0	2	2
FOXL1	0	2	2
FOXP3	0	2	2
FRMD6	0	2	2
FRZB	0	2	2
FZD3	0	2	2
FZD7	0	2	2
FZD8	0	2	2
GCNT4	0	2	2
GJD3	0	2	2
GMFB	0	2	2
GNB4	0	2	2
GPR182	0	2	2
GPR62	0	2	2
GRASP	0	2	2
GRIN2C	0	2	2
GRK4	0	2	2
GRK7	0	2	2
HASPIN	0	2	2
HAVCR2	0	2	2
HSH2D	0	2	2
HSPB6	0	2	2
IGFLR1	0	2	2
IL13RA2	0	2	2
IL22RA1	0	2	2
IL22RA2	0	2	2
IL3	0	2	2
IL5	0	2	2
INHBC	0	2	2
INHBE	0	2	2
IQCA1	0	2	2
IQCF1	0	2	2
ITGAM	0	2	2
KCNJ11	0	2	2
KCNK15	0	2	2
KCNQ1	0	2	2
KIF22	0	2	2
KIF5A	0	2	2
KRTAP10-8	0	2	2
LIN37	0	2	2
MAK	0	2	2
MAP3K6	0	2	2
MARK4	0	2	2
MARS1	0	2	2
MAST1	0	2	2
MAZ	0	2	2
MBTPS1	0	2	2
MED16	0	2	2
MEGF8	0	2	2
MLST8	0	2	2
MNAT1	0	2	2
MST1	0	2	2
MTPN	0	2	2
MVP	0	2	2
NAA38	0	2	2
NAT9	0	2	2
NEDD1	0	2	2
NRBP1	0	2	2
NRGN	0	2	2
NWD1	0	2	2
OPRK1	0	2	2
OSM	0	2	2
OTOP3	0	2	2
PAGR1	0	2	2
PARP3	0	2	2
PASK	0	2	2
PCBP4	0	2	2
PCM1	0	2	2
PCSK4	0	2	2
PCSK9	0	2	2
PEBP4	0	2	2
PIK3R4	0	2	2
PKDCC	0	2	2
PLAA	0	2	2
PLK3	0	2	2
PLK4	0	2	2
PLPP3	0	2	2
PLTP	0	2	2
PLXNB3	0	2	2
PMPCA	0	2	2
PNCK	0	2	2
POU3F1	0	2	2
PPP4R3A	0	2	2
PPWD1	0	2	2
PRDM10	0	2	2
PREB	0	2	2
PRICKLE3	0	2	2
PRKAG1	0	2	2
PROCA1	0	2	2
PROSER3	0	2	2
PRPF4	0	2	2
PRPF4B	0	2	2
PRPF6	0	2	2
PRRT2	0	2	2
PTCH2	0	2	2
PWP1	0	2	2
RAB23	0	2	2
RABEP2	0	2	2
RAPGEF2	2	0	2
RAPGEF5	2	0	2
RASIP1	0	2	2
RGL1	2	0	2
RGS14	0	2	2
RHOB	0	2	2
RIMS4	0	2	2
RIPK4	0	2	2
RPL29	0	2	2
RPL35A	0	2	2
RRP9	0	2	2
RUNX2	0	2	2
SAMD10	0	2	2
SDF2	0	2	2
SEZ6L2	0	2	2
SFRP1	0	2	2
SFRP2	0	2	2
SH2D1B	0	2	2
SH2D3A	0	2	2
SHD	0	2	2
SIT1	0	2	2
SIX1	0	2	2
SIX4	0	2	2
SLC34A1	0	2	2
SNRNP40	0	2	2
SNX21	0	2	2
SOX13	0	2	2
SPATA25	0	2	2
SPHK1	0	2	2
STK17A	0	2	2
STK26	0	2	2
STK33	0	2	2
STON1	0	2	2
STRN4	0	2	2
TAF5L	0	2	2
TBL1Y	0	2	2
TBL2	0	2	2
TBX2	0	2	2
TENM1	0	2	2
TESK1	0	2	2
THNSL2	0	2	2
TMEM100	0	2	2
TMEM145	0	2	2
TMEM219	0	2	2
TMEM74	0	2	2
TPD52L2	0	2	2
TRADD	0	2	2
TRAF7	0	2	2
TRAPPC1	0	2	2
TTBK1	0	2	2
TTK	0	2	2
TUFM	0	2	2
UBE2B	0	2	2
UBE2E1	0	2	2
UBXN6	0	2	2
ULK3	0	2	2
UPP1	0	2	2
USH1G	0	2	2
UTP15	0	2	2
WDR4	0	2	2
WDR46	0	2	2
WDR47	0	2	2
WDR5	0	2	2
WDR53	0	2	2
WDR72	0	2	2
WDR76	0	2	2
WDR83	0	2	2
WDR97	0	2	2
WIF1	0	2	2
WIPI2	0	2	2
WNT1	0	2	2
WNT10B	0	2	2
ZBTB2	0	2	2
ZNF710	0	2	2
ZSWIM1	0	2	2
ZSWIM3	0	2	2
ACTBL2	0	3	3
ACTL6A	0	3	3
ACTR3	0	3	3
ACTR5	0	3	3
ADRB1	0	3	3
AKAP5	0	3	3
AMHR2	0	3	3
ANKAR	0	3	3
AP2A2	0	3	3
AP5M1	0	3	3
APBB1	0	3	3
APH1B	0	3	3
ARPC1B	0	3	3
ARVCF	0	3	3
BIRC5	0	3	3
BTC	0	3	3
CAPRIN2	0	3	3
CBY1	0	3	3
CCNB1	0	3	3
CCNT1	0	3	3
CCR10	0	3	3
CD81	0	3	3
CDC20	0	3	3
CDC40	0	3	3
CDK1	0	3	3
CDK10	0	3	3
CDK12	0	3	3
CDK18	0	3	3
CFAP44	0	3	3
CHAF1B	0	3	3
CLK1	0	3	3
COPS2	0	3	3
CSF3	0	3	3
CTDNEP1	0	3	3
CTF1	0	3	3
CTNND1	0	3	3
DAW1	0	3	3
DBNL	0	3	3
DCAF10	0	3	3
DCAF11	0	3	3
DCAF4	0	3	3
DISP2	0	3	3
DMPK	0	3	3
DOK3	0	3	3
DYNC1I2	0	3	3
DYRK4	0	3	3
EDNRB	0	3	3
ERCC8	0	3	3
FGR	0	3	3
FIBP	0	3	3
FNBP4	0	3	3
FPR1	0	3	3
FZD5	0	3	3
GABRR2	0	3	3
GADD45B	0	3	3
GAS1	0	3	3
GDF6	0	3	3
GNAI2	0	3	3
GPR45	0	3	3
GREM2	0	3	3
GRWD1	0	3	3
IFNLR1	0	3	3
IL12A	0	3	3
IL20RA	0	3	3
IL23R	0	3	3
IL3RA	0	3	3
IL6	0	3	3
ITGAL	0	3	3
ITGAX	0	3	3
KPNA2	0	3	3
KPNA3	0	3	3
KPNA5	0	3	3
LATS1	0	3	3
LFNG	0	3	3
LIF	0	3	3
MARK1	0	3	3
MBIP	0	3	3
MFAP2	0	3	3
MFAP5	0	3	3
MFNG	0	3	3
MOK	0	3	3
MOXD1	0	3	3
MPL	0	3	3
NAIP	0	3	3
NCSTN	0	3	3
NEK4	0	3	3
NEK5	0	3	3
NR2E3	0	3	3
OXTR	0	3	3
PAFAH1B1	0	3	3
PAK1IP1	0	3	3
PCIF1	0	3	3
PDK2	0	3	3
PELI1	0	3	3
PHKG2	0	3	3
PIAS3	0	3	3
PKMYT1	0	3	3
PLCE1	3	0	3
PLK2	0	3	3
PPP1R17	0	3	3
PPP1R1B	0	3	3
PPP2R5A	0	3	3
PQBP1	0	3	3
PRKAB1	0	3	3
PRLHR	0	3	3
PRPF19	0	3	3
PRPF40B	0	3	3
PSENEN	0	3	3
PSKH1	0	3	3
PSKH2	0	3	3
PTPN2	0	3	3
RAB14	0	3	3
RAB5C	0	3	3
RASSF4	3	0	3
RBBP4	0	3	3
RHO	0	3	3
RPS6	0	3	3
RSKR	0	3	3
SAV1	0	3	3
SCRIB	0	3	3
SCYL2	0	3	3
SCYL3	0	3	3
SFN	0	3	3
SH2D1A	0	3	3
SH2D6	0	3	3
SHE	0	3	3
SHOC2	0	3	3
SMC1A	0	3	3
SMU1	0	3	3
SOCS4	0	3	3
SPOPL	0	3	3
SPRY4	0	3	3
STK17B	0	3	3
STK36	0	3	3
STMN1	0	3	3
STRADA	0	3	3
STT3A	0	3	3
TAF5	0	3	3
TP53BP2	0	3	3
TSSK3	0	3	3
TYROBP	0	3	3
UBE2A	0	3	3
UBE2D1	0	3	3
UBE2K	0	3	3
UBE2Q1	0	3	3
UBE2S	0	3	3
UBE2V1	0	3	3
UBE2Z	0	3	3
UHMK1	0	3	3
ULK1	0	3	3
WBP4	0	3	3
WDHD1	0	3	3
WDR12	0	3	3
WDR13	0	3	3
WDR31	0	3	3
WDR54	0	3	3
WDR55	0	3	3
WDR60	0	3	3
WDR61	0	3	3
WDR62	0	3	3
WDR75	0	3	3
WDR78	0	3	3
WDR82	0	3	3
WDR86	0	3	3
WDR88	0	3	3
WDR92	0	3	3
WNT3A	0	3	3
XIAP	0	3	3
ZNRD2	0	3	3
ACTR2	0	4	4
ACTR6	0	4	4
ACVR2A	0	4	4
AGRN	0	4	4
AKTIP	0	4	4
ANGPT4	0	4	4
ANXA1	0	4	4
AP2M1	0	4	4
APAF1	0	4	4
ARCN1	0	4	4
ATG16L2	0	4	4
AVPR2	0	4	4
BAG3	0	4	4
BARD1	0	4	4
BOP1	0	4	4
BRSK1	0	4	4
BRWD3	0	4	4
BUB1	0	4	4
CAMK1G	0	4	4
CCNC	0	4	4
CD53	0	4	4
CD79B	0	4	4
CDC73	0	4	4
CDK11B	0	4	4
CFAP52	0	4	4
CFL1	0	4	4
CHRM2	0	4	4
CIDEB	0	4	4
CIR1	0	4	4
CLK2	0	4	4
CLK4	0	4	4
COPB2	0	4	4
COPS3	0	4	4
CORO7	0	4	4
CXCR2	1	3	4
DAG1	3	1	4
DCAF12	0	4	4
DCAF6	0	4	4
DFFB	0	4	4
DLL1	0	4	4
DNAI2	0	4	4
DSTYK	0	4	4
DUSP22	0	4	4
DUSP6	0	4	4
EDA2R	0	4	4
EFNA2	0	4	4
EIF2AK4	0	4	4
ELP2	0	4	4
EPO	0	4	4
EXOC2	0	4	4
FGF7	0	4	4
FRK	0	4	4
GALM	0	4	4
GCNT7	0	4	4
GDNF	0	4	4
GEMIN5	0	4	4
GIPC1	0	4	4
GJA1	0	4	4
GLMN	0	4	4
GNB1L	0	4	4
GP1BB	0	4	4
GRAPL	0	4	4
GRK3	0	4	4
HOXC8	0	4	4
HYAL2	0	4	4
IDE	0	4	4
IL15	0	4	4
IL15RA	0	4	4
IL24	0	4	4
IL31RA	0	4	4
IL9R	0	4	4
IRAK3	0	4	4
ITFG2	0	4	4
ITGAV	0	4	4
JAG2	0	4	4
KATNB1	0	4	4
KIF21A	0	4	4
KIF21B	0	4	4
KPNB1	0	4	4
LRRK1	0	4	4
LRWD1	0	4	4
LY6E	0	4	4
MADCAM1	0	4	4
MAGEA9	0	4	4
MAGED1	0	4	4
MAPK6	0	4	4
MAVS	0	4	4
MTMR4	0	4	4
MYLK2	0	4	4
MYO3A	0	4	4
NBEAL1	0	4	4
NEK9	0	4	4
NOTCH4	0	4	4
NRG4	0	4	4
NSMAF	0	4	4
NUP43	0	4	4
PAK6	0	4	4
PHIP	0	4	4
PINK1	0	4	4
PIP5K1A	0	4	4
PITRM1	0	4	4
PKN1	0	4	4
PLK1	0	4	4
PPP1R13B	0	4	4
PRAG1	0	4	4
PRKAB2	0	4	4
PRKACB	0	4	4
PRKAR1A	0	4	4
PRKG2	0	4	4
PRPF40A	0	4	4
PTH1R	1	3	4
PWP2	0	4	4
RAE1	0	4	4
RAPH1	4	0	4
ROCK2	0	4	4
RPS6KB2	0	4	4
SAG	0	4	4
SDCBP	0	4	4
SH2D4B	0	4	4
SH2D7	0	4	4
SMO	0	4	4
STK31	0	4	4
STK32A	0	4	4
STK38L	0	4	4
STKLD1	0	4	4
STMN2	0	4	4
STRADB	0	4	4
STXBP5	0	4	4
TGFB1I1	0	4	4
TGFBRAP1	0	4	4
TIFA	0	4	4
TLE4	0	4	4
TLK1	0	4	4
TNS4	0	4	4
TOPBP1	0	4	4
TRAF5	0	4	4
TRAIP	0	4	4
TRIB2	0	4	4
UBE2D2	0	4	4
UBE2D4	0	4	4
UBE2G2	0	4	4
UBE2L3	0	4	4
UBE2QL1	0	4	4
UBE2R2	0	4	4
UBE2T	0	4	4
UBE2V2	0	4	4
UPP2	0	4	4
UQCRC2	0	4	4
USP7	0	4	4
VRK1	0	4	4
WAC	0	4	4
WDR17	0	4	4
WDR25	0	4	4
WDR26	0	4	4
WDR36	0	4	4
WDR49	0	4	4
WDR74	0	4	4
WDR77	0	4	4
WDR89	0	4	4
WIPI1	0	4	4
WNT2	0	4	4
WNT5A	0	4	4
WSB1	0	4	4
XRCC1	0	4	4
AATK	0	5	5
ACAP1	0	5	5
ACP1	0	5	5
ACTB	0	5	5
ACTR1B	0	5	5
ACVR2B	0	5	5
ADRA2B	1	4	5
ADRA2C	1	4	5
AKAP12	0	5	5
AKAP9	0	5	5
ANGPT1	0	5	5
AP3M1	0	5	5
APBB1IP	5	0	5
AREG	0	5	5
ARMC3	0	5	5
ATG16L1	0	5	5
AZI2	0	5	5
BIRC3	0	5	5
BMP2K	0	5	5
BMP4	0	5	5
BRSK2	0	5	5
CAMK2B	0	5	5
CCNE1	0	5	5
CCNYL1	0	5	5
CD244	0	5	5
CDC42BPG	0	5	5
CDK17	0	5	5
CDKL3	0	5	5
CILK1	0	5	5
COPA	0	5	5
CORO2A	0	5	5
CTDSP2	0	5	5
DISP1	0	5	5
DMXL1	0	5	5
DMXL2	0	5	5
DOK7	0	5	5
DRP2	0	5	5
DTL	0	5	5
DTX4	0	5	5
DUSP4	0	5	5
EIF2AK3	0	5	5
EIPR1	0	5	5
ELP1	0	5	5
EML1	0	5	5
EML2	0	5	5
FBXW2	0	5	5
FGF10	0	5	5
FOXH1	0	5	5
FZR1	0	5	5
HERC1	0	5	5
HIPK1	0	5	5
HOMER2	0	5	5
IFNGR1	0	5	5
IKBKB	0	5	5
IL12RB1	0	5	5
IL19	0	5	5
IL20RB	0	5	5
IL7	0	5	5
IRF9	0	5	5
ITGA9	0	5	5
KIDINS220	0	5	5
KPNA1	0	5	5
KPNA4	0	5	5
KREMEN1	0	5	5
LLGL2	0	5	5
LPXN	0	5	5
LRRFIP2	0	5	5
MAP3K15	0	5	5
MAP3K19	0	5	5
MAP4K3	0	5	5
MAST3	0	5	5
MED12	0	5	5
MEP1A	0	5	5
MIB2	0	5	5
MYLK3	0	5	5
NBEAL2	0	5	5
NEK1	0	5	5
NEK8	0	5	5
NEURL1	0	5	5
NIM1K	0	5	5
NKIRAS1	0	5	5
NLE1	0	5	5
NOD2	0	5	5
NR2C1	0	5	5
NRDC	0	5	5
NRK	0	5	5
NUAK2	0	5	5
NUP37	0	5	5
P2RX7	0	5	5
PAAF1	0	5	5
PCSK2	0	5	5
PDGFA	0	5	5
PEA15	0	5	5
PEAK1	0	5	5
PES1	0	5	5
PEX7	0	5	5
PKD1	0	5	5
PKP1	0	5	5
POFUT1	0	5	5
POTEE	0	5	5
POTEF	0	5	5
PPP2R5B	0	5	5
PRKAR2A	0	5	5
PRKX	0	5	5
PRL	0	5	5
RALGDS	5	0	5
RASSF6	5	0	5
RBX1	0	5	5
REV1	0	5	5
RPS6KC1	0	5	5
RPS6KL1	0	5	5
SEC31A	0	5	5
SEC31B	0	5	5
SGK2	0	5	5
SH2D3C	0	5	5
SHC4	0	5	5
SIK2	0	5	5
SLA2	0	5	5
SLC12A2	0	5	5
SMAD5	0	5	5
SOCS2	0	5	5
SPOP	0	5	5
STAP1	0	5	5
STK32B	0	5	5
STK38	0	5	5
STK40	0	5	5
STRN3	0	5	5
TAL1	0	5	5
TAOK1	0	5	5
TAOK2	0	5	5
TBC1D31	0	5	5
TCERG1	0	5	5
TEP1	0	5	5
TFG	0	5	5
THRAP3	0	5	5
TNS2	0	5	5
TPP2	0	5	5
TRAF4	0	5	5
TTBK2	0	5	5
UBE2C	0	5	5
UBE2E3	0	5	5
UBE2G1	0	5	5
UBE2I	0	5	5
UBE2Q2	0	5	5
UBE2W	0	5	5
WDR1	0	5	5
WDR11	0	5	5
WDR20	0	5	5
WDR34	0	5	5
WDR41	0	5	5
WDR43	0	5	5
WDR44	0	5	5
WDR45	0	5	5
WDR45B	0	5	5
WDR64	0	5	5
WDR66	0	5	5
WDR90	0	5	5
WDSUB1	0	5	5
WEE1	0	5	5
WNK2	0	5	5
WNK3	0	5	5
WNT4	0	5	5
WRAP73	0	5	5
WSB2	0	5	5
YES1	0	5	5
YTHDC1	0	5	5
ZNF106	0	5	5
ACTL8	0	6	6
ACTR3C	0	6	6
ACVR1B	0	6	6
ADRA1A	0	6	6
ANAPC2	0	6	6
ANKRD6	0	6	6
ARHGAP12	0	6	6
ARHGAP27	0	6	6
ARHGAP39	0	6	6
ARMC8	0	6	6
ARPC1A	0	6	6
BDNF	0	6	6
BIRC6	0	6	6
CCKBR	1	5	6
CCNA2	0	6	6
CDC42BPB	0	6	6
CDK13	0	6	6
CELSR3	1	5	6
CFAP57	0	6	6
CNKSR2	0	6	6
CNTN6	0	6	6
CORO1C	0	6	6
DDIT3	0	6	6
DNAI1	0	6	6
DNTT	0	6	6
DRD2	0	6	6
DUSP3	0	6	6
ECT2	0	6	6
EEF1E1	0	6	6
EML5	0	6	6
FBXW4	0	6	6
GADD45G	0	6	6
GAK	0	6	6
GATA3	0	6	6
GCNT2	0	6	6
GDF1	0	6	6
HBEGF	0	6	6
HOMER1	0	6	6
HTR2C	0	6	6
IFNGR2	0	6	6
IFT140	0	6	6
IFT80	0	6	6
IL13RA1	0	6	6
ITGA2	0	6	6
ITGA5	0	6	6
ITGA7	0	6	6
ITGA8	0	6	6
ITGB8	0	6	6
KIFAP3	0	6	6
KPNA6	0	6	6
MAGI3	0	6	6
MAP3K14	0	6	6
MAP4K2	0	6	6
MAPK13	0	6	6
MAPKBP1	0	6	6
MIB1	0	6	6
MPZL1	0	6	6
MTAP	0	6	6
MUSK	0	6	6
MYLK4	0	6	6
NDC80	0	6	6
NEK7	0	6	6
NGEF	0	6	6
NGF	0	6	6
NKD1	0	6	6
P2RY2	0	6	6
PARP4	0	6	6
PAXIP1	0	6	6
PCSK7	0	6	6
PKP4	0	6	6
PPP2R5E	0	6	6
PRKCSH	0	6	6
PRKD2	0	6	6
PRKD3	0	6	6
PTN	0	6	6
RAB4A	0	6	6
RAD9A	0	6	6
RGL2	6	0	6
RHOQ	0	6	6
RIN2	6	0	6
RPS6KA6	0	6	6
SCAP	0	6	6
SCTR	0	6	6
SEH1L	0	6	6
SH2D4A	0	6	6
SH3RF1	0	6	6
SOCS5	0	6	6
SPAG6	0	6	6
STK32C	0	6	6
STT3B	0	6	6
STXBP4	0	6	6
SUPT6H	0	6	6
TANK	0	6	6
TBCK	0	6	6
TLE2	0	6	6
TNFRSF13B	0	6	6
TXK	0	6	6
UBASH3A	0	6	6
UBE2O	0	6	6
UBE2U	0	6	6
ULK2	0	6	6
WDFY1	0	6	6
WDR33	0	6	6
WDR37	0	6	6
WDR48	0	6	6
WDR63	0	6	6
WNT7A	0	6	6
ADRA1B	0	7	7
AHI1	0	7	7
BCL9	0	7	7
BLK	0	7	7
BMP8B	0	7	7
CAMK2G	0	7	7
CAMK4	0	7	7
CD7	1	6	7
CDC42EP3	0	7	7
CDK15	0	7	7
CDK19	0	7	7
CHN1	0	7	7
COP1	0	7	7
CORO1A	5	2	7
CSF1	0	7	7
CSNK1E	0	7	7
CSNK1G1	0	7	7
CUL3	0	7	7
DBP	1	6	7
DCLK2	0	7	7
DENND3	0	7	7
DISP3	0	7	7
DUSP5	0	7	7
DVL3	0	7	7
DYNC1I1	0	7	7
ESRRB	0	7	7
FADD	0	7	7
FBXW8	0	7	7
GCNT1	0	7	7
GNB5	0	7	7
GNG2	0	7	7
GNG4	1	6	7
GRK6	0	7	7
GTF2A1L	0	7	7
HHAT	0	7	7
HIPK3	0	7	7
IL21R	0	7	7
IL27RA	1	6	7
IL6R	0	7	7
INVS	0	7	7
ITGA1	0	7	7
ITGA11	0	7	7
ITGB6	0	7	7
JUP	0	7	7
KCNH2	2	5	7
LATS2	0	7	7
LAX1	0	7	7
LHCGR	0	7	7
LSP1	0	7	7
LTBR	0	7	7
LYST	0	7	7
MAP3K12	0	7	7
MAPKAPK5	0	7	7
MARK3	0	7	7
MELK	0	7	7
MRAS	1	6	7
MTSS1	0	7	7
NEK10	0	7	7
NEK11	0	7	7
NR0B2	0	7	7
NR2F6	0	7	7
OBSCN	0	7	7
PAM	0	7	7
PARK7	0	7	7
PDGFC	0	7	7
PDGFD	0	7	7
PDIK1L	2	5	7
PLCB2	0	7	7
PLEKHA5	0	7	7
PXK	0	7	7
RAP1GDS1	0	7	7
RAPGEF3	7	0	7
RFC1	0	7	7
RFWD3	0	7	7
RFX1	0	7	7
RHEB	0	7	7
RHOD	0	7	7
RIPK2	0	7	7
ROR1	0	7	7
RSU1	0	7	7
SBK1	0	7	7
SETD2	0	7	7
SNRK	0	7	7
SPEG	0	7	7
STK11	0	7	7
STK35	0	7	7
STRN	0	7	7
TAOK3	0	7	7
TBL1XR1	0	7	7
THOC3	0	7	7
TICAM2	0	7	7
TLK2	0	7	7
TNFRSF11A	0	7	7
TNFRSF19	0	7	7
TOLLIP	0	7	7
TRIM37	0	7	7
TRIO	0	7	7
TRPV4	0	7	7
TSC1	0	7	7
TULP4	0	7	7
UBE2H	0	7	7
UBE2N	0	7	7
VRK2	0	7	7
WDFY2	0	7	7
WDR59	0	7	7
WWC1	0	7	7
WWP2	0	7	7
AAK1	0	8	8
ACTA1	0	8	8
ADGRB1	0	8	8
AGAP2	2	6	8
AP2B1	0	8	8
ASIC1	2	6	8
ATP2A2	0	8	8
AXIN2	0	8	8
BCAR3	0	8	8
BRWD1	0	8	8
CABLES1	0	8	8
CAMKK2	0	8	8
CASK	0	8	8
CASP1	0	8	8
CCNY	0	8	8
CD79A	0	8	8
CDK6	0	8	8
CDKL1	0	8	8
CELSR2	1	7	8
CFLAR	0	8	8
CHMP3	0	8	8
CISH	0	8	8
CORO2B	0	8	8
CSNK1D	0	8	8
DNER	0	8	8
EML4	0	8	8
EML6	0	8	8
GAP43	0	8	8
GAS6	0	8	8
GNB1	0	8	8
GNG12	0	8	8
GRIK3	0	8	8
HECW1	0	8	8
HECW2	0	8	8
HTR2A	0	8	8
IKBKE	0	8	8
ITGA2B	6	2	8
ITGA6	0	8	8
LRRK2	0	8	8
MAP3K13	0	8	8
MAST2	0	8	8
MCPH1	0	8	8
MYD88	0	8	8
NR5A1	0	8	8
NUAK1	0	8	8
PAG1	0	8	8
PI4K2B	0	8	8
POC1B	0	8	8
RAC3	4	4	8
RAN	0	8	8
RNF111	0	8	8
ROS1	0	8	8
RYBP	0	8	8
SGK3	0	8	8
SH3GLB1	4	4	8
SIK3	0	8	8
SLA	0	8	8
SRPK2	0	8	8
SSTR2	2	6	8
STK39	0	8	8
STON2	0	8	8
STXBP5L	0	8	8
TGIF1	0	8	8
TIAM1	8	0	8
TICAM1	0	8	8
TLE3	0	8	8
TNS1	0	8	8
TNS3	0	8	8
TRIM33	0	8	8
TTN	0	8	8
UBASH3B	0	8	8
UBE2E2	0	8	8
VRK3	0	8	8
WDFY3	0	8	8
WDR27	0	8	8
WDR7	0	8	8
WDR70	0	8	8
WDTC1	0	8	8
WWTR1	0	8	8
ADA	0	9	9
AMBRA1	0	9	9
ARR3	0	9	9
ATF1	0	9	9
ATR	0	9	9
BMP6	0	9	9
BMPR1A	0	9	9
CAMK1D	0	9	9
CARD11	0	9	9
CAV3	0	9	9
CDKL5	0	9	9
CHN2	0	9	9
CSPG4	0	9	9
CTNND2	0	9	9
DAB1	0	9	9
DAPK2	0	9	9
DCLK1	0	9	9
DGKQ	9	0	9
DRD3	3	6	9
GNAO1	0	9	9
HIRA	0	9	9
HUNK	0	9	9
KALRN	0	9	9
KSR2	0	9	9
LAT2	2	7	9
LMTK2	0	9	9
LRP2	0	9	9
MACF1	0	9	9
MAST4	0	9	9
MYLK	0	9	9
NOD1	0	9	9
NR2F1	0	9	9
NRG2	0	9	9
OGT	0	9	9
OXSR1	0	9	9
PCSK5	0	9	9
PPP1R15A	3	6	9
PPP2R5D	4	5	9
PRKCH	0	9	9
PTCH1	0	9	9
RACK1	0	9	9
RANBP3	0	9	9
RASSF3	9	0	9
RPTOR	0	9	9
SHANK2	0	9	9
STK10	0	9	9
TBL1X	0	9	9
TGFB2	2	7	9
TIE1	3	6	9
TNFRSF10B	0	9	9
TNFRSF14	0	9	9
TRAF3IP2	0	9	9
UTRN	0	9	9
VAV2	0	9	9
WDR35	0	9	9
WNK1	0	9	9
WWC2	0	9	9
AGTR1	0	10	10
AIFM1	0	10	10
AKT3	0	10	10
ATM	0	10	10
BRCA2	0	10	10
CAMK2D	0	10	10
CCNG2	0	10	10
CD2	0	10	10
CDC42SE2	2	8	10
CSNK1A1L	7	3	10
DLG4	0	10	10
DMD	0	10	10
DOK6	1	9	10
EPHA6	0	10	10
EVL	0	10	10
GABRB3	0	10	10
GAS7	0	10	10
GNA12	0	10	10
GNAZ	1	9	10
GNG7	0	10	10
GRM3	1	9	10
ITGA4	0	10	10
ITPR1	0	10	10
LRBA	0	10	10
LRP5	0	10	10
MAML3	0	10	10
MS4A2	3	7	10
MYO3B	0	10	10
NISCH	0	10	10
NR1H3	0	10	10
NRG3	0	10	10
NTF3	0	10	10
OPRD1	2	8	10
PDC	5	5	10
PIAS4	0	10	10
PIM1	3	7	10
PTPRK	0	10	10
RAB7A	0	10	10
RALA	7	3	10
RALB	7	3	10
RASSF2	10	0	10
RBPJ	0	10	10
RFC4	5	5	10
S1PR1	2	8	10
SIRT1	0	10	10
SLC9A3R1	0	10	10
SNW1	0	10	10
SOCS1	0	10	10
SPAG16	0	10	10
SPAG9	0	10	10
STRAP	0	10	10
TNFRSF8	0	10	10
TNIP2	3	7	10
TRAF1	0	10	10
UCHL5	6	4	10
ULK4	0	10	10
USP6NL	1	9	10
VAV3	0	10	10
WDFY4	0	10	10
AFDN	3	8	11
AKT1S1	6	5	11
APBB2	0	11	11
ARAP1	11	0	11
ARHGAP5	0	11	11
CCKAR	1	10	11
CHRM3	0	11	11
CLNK	0	11	11
CSF2RA	7	4	11
DAAM1	0	11	11
DAB2	0	11	11
DAXX	0	11	11
EFNB1	7	4	11
ERN1	0	11	11
FGFR3	4	7	11
GRIA4	0	11	11
GRK5	0	11	11
GRM5	0	11	11
IGF1	0	11	11
ITGB5	0	11	11
MAML2	0	11	11
MTNR1B	1	10	11
NF2	0	11	11
NLK	0	11	11
NR1H2	0	11	11
NUMBL	5	6	11
PAK5	0	11	11
PDE6G	2	9	11
PPP5C	0	11	11
RGS12	11	0	11
RPS6KA3	0	11	11
RXRG	0	11	11
SKIL	0	11	11
SNX6	0	11	11
TGM2	0	11	11
TOP2A	0	11	11
TRIB3	6	5	11
UBE2D3	0	11	11
XYLT1	0	11	11
BCAS3	0	12	12
BMP7	0	12	12
CDC7	6	6	12
CRADD	0	12	12
GPC3	0	12	12
GRIN2A	0	12	12
IL4R	0	12	12
MAX	0	12	12
NUMB	0	12	12
NUP153	0	12	12
OCRL	1	11	12
PARP1	0	12	12
PRKAG2	0	12	12
PSEN2	0	12	12
RRAD	5	7	12
SH3BP5	0	12	12
SIK1	6	6	12
SOCS3	0	12	12
SYNJ1	4	8	12
TLR2	3	9	12
TYRO3	2	10	12
UBE2J2	0	12	12
UBR5	0	12	12
ABCA1	0	13	13
CDK4	0	13	13
CHRNA7	0	13	13
ESRRA	3	10	13
FSHR	2	11	13
GABRR1	0	13	13
GFRA1	1	12	13
GRIA3	0	13	13
GRIN2B	0	13	13
MCC	1	12	13
NR4A3	3	10	13
NRG1	0	13	13
OSMR	5	8	13
OTUD7B	1	12	13
PLD1	1	12	13
PTPN22	1	12	13
PTPRD	0	13	13
RALBP1	1	12	13
RIN1	7	6	13
RXRB	0	13	13
SIRPA	1	12	13
TBXA2R	3	10	13
TCF4	0	13	13
TNFRSF10A	0	13	13
CNTNAP1	1	13	14
CREB1	0	14	14
DCAF8	0	14	14
DDR1	4	10	14
ELK3	1	13	14
EPHB3	6	8	14
GLIS2	0	14	14
GRIK1	1	13	14
GRM1	0	14	14
HTT	0	14	14
IL23A	0	14	14
ITSN1	0	14	14
MAP3K20	9	5	14
MTNR1A	4	10	14
NPHS1	3	11	14
NRAS	4	10	14
PPP2R2B	0	14	14
PPP4C	7	7	14
PTPRA	1	13	14
RAP2A	8	6	14
RARB	0	14	14
RYK	0	14	14
SKAP2	3	11	14
TAB2	0	14	14
TRAT1	9	5	14
TRIB1	9	5	14
ZFYVE9	0	14	14
ARRB2	0	15	15
EPS8	5	10	15
HDAC6	0	15	15
HUS1	5	10	15
KRAS	5	10	15
MAP2K6	0	15	15
MAPK8IP3	0	15	15
PAK3	6	9	15
PIAS2	0	15	15
PLD2	2	13	15
PPP1R2	8	7	15
RAPGEF6	15	0	15
RIPK1	3	12	15
STK16	11	4	15
STK24	0	15	15
TRIP6	6	9	15
WASL	3	12	15
FEN1	3	13	16
FRS3	9	7	16
GNA13	7	9	16
GNAI3	9	7	16
ILK	8	8	16
LEPR	5	11	16
MEF2D	6	10	16
MICAL1	7	9	16
NR1H4	7	9	16
PEBP1	0	16	16
RAP1A	3	13	16
CD19	7	10	17
CNKSR1	11	6	17
DTX1	9	8	17
ERBIN	9	8	17
GRIK2	3	14	17
GRIN1	2	15	17
HNF1A	6	11	17
IHH	0	17	17
KSR1	5	12	17
LTK	10	7	17
NCKIPSD	12	5	17
PDE4D	0	17	17
PIAS1	0	17	17
RANBP9	0	17	17
RASSF1	11	6	17
SLC9A1	9	8	17
SUFU	10	7	17
TGFB1	9	8	17
ARF6	0	18	18
CAV1	0	18	18
CDK16	14	4	18
CSF3R	7	11	18
DHH	0	18	18
DKK1	0	18	18
DUSP9	0	18	18
EIF4EBP1	0	18	18
ERRFI1	0	18	18
FOS	0	18	18
FOXO4	7	11	18
PPFIA1	10	8	18
RGS10	0	18	18
ADAM10	6	13	19
ANGPT2	0	19	19
CAV2	7	12	19
CDK5R1	0	19	19
CHMP4A	0	19	19
CIT	9	10	19
CSTF1	15	4	19
DUSP1	7	12	19
ELK1	1	18	19
EPHA1	0	19	19
FGF9	0	19	19
FKBP1A	0	19	19
FLT4	5	14	19
GDF5	0	19	19
GP1BA	0	19	19
GRIN2D	4	15	19
IL1A	0	19	19
IL2	0	19	19
IL22	0	19	19
INHBA	0	19	19
ITGB7	12	7	19
LAMTOR3	0	19	19
LIFR	10	9	19
MAP3K11	5	14	19
MED14	9	10	19
NOTCH3	12	7	19
PRKAA2	5	14	19
RGS7	6	13	19
SHH	0	19	19
SOCS7	14	5	19
STUB1	0	19	19
THPO	0	19	19
THRB	0	19	19
WWOX	2	17	19
ABI1	14	6	20
CSF2	0	20	20
EPHA7	0	20	20
EPN1	0	20	20
IFNG	0	20	20
IGF2	0	20	20
IL10RB	0	20	20
IL4	0	20	20
INS	0	20	20
KRT8	6	14	20
LRIG1	4	16	20
LTC4S	0	20	20
MAGI1	0	20	20
MAPK4	11	9	20
NGFR	5	15	20
PARD6A	8	12	20
PIDD1	0	20	20
PIK3CD	6	14	20
PML	0	20	20
PPM1A	4	16	20
RRAS	6	14	20
SAP18	0	20	20
TIRAP	0	20	20
TXN	0	20	20
ATF2	7	14	21
BIRC2	0	21	21
CDC42BPA	11	10	21
CLIC1	0	21	21
CTDSP1	0	21	21
DOK4	8	13	21
HHIP	0	21	21
IGFBP1	0	21	21
IL10RA	0	21	21
IL1B	0	21	21
IL5RA	0	21	21
JAG1	0	21	21
KAT5	0	21	21
PITX2	0	21	21
PLCB1	3	18	21
PPP1R9B	12	9	21
PTPRB	6	15	21
PTPRE	3	18	21
SORBS2	5	16	21
SPRY2	8	13	21
WASF2	10	11	21
ANXA5	1	21	22
AP1M1	13	9	22
CAMK2A	17	5	22
CCNJL	15	7	22
CDK5	8	14	22
DUSP16	9	13	22
EPHB4	0	22	22
IL10	0	22	22
LEF1	0	22	22
MAP3K9	0	22	22
PIK3CB	7	15	22
PRMT1	9	13	22
RASSF7	22	0	22
SHC2	14	8	22
STAP2	0	22	22
CCR5	10	13	23
CD247	0	23	23
DCAF5	15	8	23
EIF4E	0	23	23
EPHB1	7	16	23
FCGR1A	0	23	23
FGF2	0	23	23
GH1	2	21	23
GIT1	11	12	23
GNAI1	13	10	23
GRIA1	6	17	23
IGF2R	0	23	23
IRAK1	12	11	23
MATK	13	10	23
MDC1	0	23	23
MKNK2	0	23	23
NPHP1	0	23	23
NUP214	0	23	23
PICK1	13	10	23
PIK3C2B	3	20	23
PPP2R2A	0	23	23
RND1	2	21	23
TOB1	0	23	23
TRIP10	0	23	23
UBE2F	18	5	23
EGF	0	24	24
EPHA8	0	24	24
IFNAR2	0	24	24
KAT2A	0	24	24
MEF2C	7	17	24
NOS3	0	24	24
NR2F2	8	16	24
PRKG1	14	10	24
PSTPIP1	0	24	24
RASSF5	7	17	24
ROR2	0	24	24
RPS6KA4	15	9	24
TGFB3	0	24	24
WWP1	0	24	24
AKT2	0	25	25
BOC	0	25	25
CD4	8	17	25
DVL1	16	9	25
EPHA5	0	25	25
IL13	4	21	25
MALT1	0	25	25
MAPKAPK3	0	25	25
MINK1	5	20	25
NEK3	20	5	25
NR2C2	0	25	25
PATJ	0	25	25
PTPRZ1	3	22	25
RAB11A	0	25	25
RAP1GAP	0	25	25
STAM	10	15	25
APPL1	3	23	26
CCND1	9	17	26
CD2AP	0	26	26
CTBP1	0	26	26
DDR2	0	26	26
DUSP10	0	26	26
FER	9	17	26
FGF1	0	26	26
FLNB	0	26	26
FRAT1	0	26	26
IRAK2	0	26	26
ITGB2	0	26	26
PTPRT	0	26	26
RHOC	2	24	26
RHOU	3	23	26
SNX9	0	26	26
STAT4	11	15	26
ARHGEF7	6	21	27
CDK8	0	27	27
EFNA1	0	27	27
MKNK1	0	27	27
NOS2	3	24	27
NR5A2	0	27	27
PTPRG	0	27	27
RRAS2	17	10	27
SNIP1	18	9	27
TLR3	2	25	27
BMP2	7	21	28
CDK14	9	19	28
EPHA4	0	28	28
EPS15	14	14	28
ESRRG	0	28	28
FBXW7	15	13	28
HGF	0	28	28
IL7R	0	28	28
MAGI2	0	28	28
MAPK7	13	15	28
MAPK8IP2	23	5	28
MEF2A	0	28	28
NR1I3	3	25	28
PDK1	2	26	28
PPP2R5C	0	28	28
RAD51	0	28	28
RAP1B	4	24	28
RARG	0	28	28
STAT2	14	14	28
TLR4	0	28	28
CEBPB	28	1	29
CNTN1	3	26	29
IL2RB	13	16	29
KRT18	18	11	29
NOTCH2	0	29	29
NR1I2	0	29	29
SOCS6	20	9	29
SORBS1	0	29	29
TRAF2	0	29	29
YAP1	10	19	29
CBLC	7	23	30
CCNK	21	9	30
DAPK3	8	22	30
GRIA2	3	27	30
IL1RAP	3	27	30
MAP2K7	0	30	30
NR1D1	0	30	30
PDE3B	0	30	30
PLCG2	12	18	30
POC1A	20	10	30
SPTBN1	17	13	30
EPHA3	0	31	31
GHR	0	31	31
GNAQ	15	16	31
IL1R1	8	23	31
LAT	20	11	31
MAP3K8	22	9	31
MERTK	6	25	31
PTEN	10	21	31
RHOA	0	31	31
ROCK1	0	31	31
SKI	0	31	31
TBK1	22	9	31
AKAP13	9	23	32
CHUK	11	21	32
CSF2RB	16	16	32
DOK5	0	32	32
EEF1A1	24	8	32
IFNAR1	19	13	32
LIMK1	5	27	32
MED1	14	18	32
NR3C2	2	30	32
PIN1	4	28	32
ADAM17	4	29	33
CNTFR	3	30	33
DFFA	5	28	33
GSK3A	20	13	33
NRIP1	17	16	33
PPARA	0	33	33
PRKAA1	19	14	33
PRKN	10	23	33
PTK6	9	24	33
SH2B1	27	6	33
CCND3	24	10	34
EFNB2	16	18	34
FLT3	6	28	34
FOXO1	15	19	34
MAP2K5	12	22	34
NR4A2	7	27	34
SORBS3	9	25	34
CSNK2A2	4	31	35
GRIP1	23	12	35
MAP3K10	0	35	35
NBEA	25	10	35
SH2B3	21	14	35
SH3GL2	6	29	35
SRPK1	12	23	35
ADRB2	5	31	36
FCGR2B	4	32	36
SH2D2A	31	5	36
VEGFB	2	34	36
HIF1A	0	37	37
INPPL1	10	27	37
MAP2K3	21	16	37
MAP3K4	18	19	37
[truncated: 292 more rows]
